# Supplementary material for: Effectiveness of Moringa oleifera, chitosan, and alum as adsorbents in lake water treatment
Source: Environ Sci Pollut Res Int. 2026 Feb 10;33(8):3293–309. doi: 10.1007/s11356-026-37492-7 (PMC13005850; doi:10.1007/s11356-026-37492-7)
Supplement: Supplementary file 1 — (XLSX 18.1 KB) [file 11356_2026_37492_MOESM1_ESM.xlsx]

## Sheet: Sheet1
			pH		Mean	SD		DO (mg/L)		Mean	SD		Cond (S/m)		Mean	SD		TDS (mg/L)		Mean	SD		Turbidity (NTU)		Mean	SD		Nitrates (mg/L)		Mean	SD		Sulfate (mg/L)		Mean	SD
Lake water		7.11	7.12	7.13	7.12	0.01	2.04	2.06	2.08	2.06	0.02	272	277	282	277	5	135	137	139	137	2	37.69	38.19	36.12	37.3333	1.08011	3.3	3.2	3.3	3.26667	0.057735	64	65	66	65	1
	30	6.7	6.73	6.75	6.72667	0.0251661	2.96	2.94	2.98	2.96	0.02	269	267	273	269.667	3.05505	135	133	137	135	2	1.08	1.11	1.1	1.09667	0.0152753	3.2	3.3	3.2	3.23333	0.057735	50	49	50	49.6667	0.57735
A1	60	6.8	6.81	6.79	6.8	0.01	3.06	3.03	3.09	3.06	0.03	274	276	278	276	2	140	136	138	138	2	0.15	0.13	0.17	0.15	0.02	3.3	3.2	3.3	3.26667	0.057735	50	51	49	50	1
	90	6.82	6.81	6.83	6.82	0.01	3.11	3.13	3.15	3.13	0.02	276	275	277	276	1	139	138	137	138	1	0.33	0.35	0.31	0.33	0.02	3.2	3.2	3.3	3.23333	0.057735	51	49	50	50	1
	30	6.74	6.75	6.75	6.74667	0.0057735	3.02	3.01	3.01	3.01333	0.0057735	265	267	266	266	1	133	133	134	133.333	0.57735	0.47	0.48	0.48	0.476667	0.0057735	3.3	3.3	3.2	3.26667	0.057735	59	59	60	59.3333	0.57735
A2	60	6.85	6.82	6.84	6.83667	0.0152753	3.04	3.03	3.02	3.03	0.01	269	270	271	270	1	135	134	135	134.667	0.57735	0.18	0.17	0.18	0.176667	0.0057735	3.3	3.3	3.3	3.3	5.43896e-16	59	60	59	59.3333	0.57735
	90	6.84	6.85	6.83	6.84	0.01	3.16	3.14	3.15	3.15	0.01	269	267	268	268	1	134	134	135	134.333	0.57735	0.28	0.29	0.27	0.28	0.01	3.2	3.3	3.2	3.23333	0.057735	59	59	59	59	0
	30	6.64	6.66	6.65	6.65	0.01	3.02	3.01	3.02	3.01667	0.0057735	266	265	266	265.667	0.57735	132	133	133	132.667	0.57735	0.41	0.42	0.42	0.416667	0.0057735	3.2	3.2	3.2	3.2	5.43896e-16	70	71	70	70.3333	0.57735
A3	60	6.84	6.85	6.85	6.84667	0.0057735	3.06	3.08	3.07	3.07	0.01	267	266	267	266.667	0.57735	134	133	134	133.667	0.57735	0.21	0.21	0.2	0.206667	0.0057735	3.2	3.2	3.2	3.2	5.43896e-16	70	70	70	70	0
	90	6.85	6.86	6.85	6.85333	0.0057735	3.14	3.13	3.15	3.14	0.01	264	265	264	264.333	0.57735	132	133	132	132.333	0.57735	0.27	0.26	0.27	0.266667	0.0057735	3.3	3.3	3.2	3.26667	0.057735	71	71	72	71.3333	0.57735
	30	6.7	6.71	6.69	6.7	0.01	2.74	2.73	2.74	2.73667	0.0057735	275	274	274	274.333	0.57735	136	137	137	136.667	0.57735	3.04	3.05	3.04	3.04333	0.0057735	3.3	3.3	3.3	3.3	5.43896e-16	67	67	66	66.6667	0.57735
C1	60	6.65	6.65	6.64	6.64667	0.0057735	3.05	3.03	3.04	3.04	0.01	269	269	268	268.667	0.57735	134	135	134	134.333	0.57735	1.08	1.07	1.08	1.07667	0.0057735	3.2	3.2	3.2	3.2	5.43896e-16	66	65	66	65.6667	0.57735
	90	6.61	6.62	6.63	6.62	0.01	3.25	3.23	3.24	3.24	0.01	270	270	269	269.667	0.57735	135	136	135	135.333	0.57735	1.67	1.66	1.67	1.66667	0.0057735	3.4	3.4	3.3	3.36667	0.057735	65	65	65	65	0
	30	6.57	6.58	6.57	6.57333	0.0057735	2.72	2.73	2.72	2.72333	0.0057735	274	275	275	274.667	0.57735	137	137	136	136.667	0.57735	1.32	1.33	1.33	1.32667	0.0057735	3.2	3.2	3.2	3.2	5.43896e-16	65	65	65	65	0
C2	60	6.51	6.52	6.51	6.51333	0.0057735	3.03	3.03	3.02	3.02667	0.0057735	269	270	270	269.667	0.57735	134	134	134	134	0	0.59	0.58	0.59	0.586667	0.0057735	3.3	3.4	3.4	3.36667	0.057735	65	66	65	65.3333	0.57735
	90	6.48	6.47	6.48	6.47667	0.0057735	3.18	3.18	3.17	3.17667	0.0057735	269	268	268	268.333	0.57735	135	135	135	135	0	0.63	0.62	0.63	0.626667	0.0057735	3.2	3.2	3.2	3.2	5.43896e-16	65	65	65	65	0
	30	6.45	6.44	6.45	6.44667	0.0057735	2.63	2.62	2.63	2.62667	0.0057735	273	272	273	272.667	0.57735	136	136	137	136.333	0.57735	0.4	0.39	0.4	0.396667	0.0057735	3.3	3.3	3.3	3.3	5.43896e-16	65	65	65	65	0
C3	60	6.41	6.41	6.4	6.40667	0.0057735	2.86	2.86	2.87	2.86333	0.0057735	271	271	270	270.667	0.57735	136	137	136	136.333	0.57735	0.29	0.28	0.29	0.286667	0.0057735	3.3	3.3	3.3	3.3	5.43896e-16	65	66	65	65.3333	0.57735
	90	6.37	6.38	6.38	6.37667	0.0057735	3.01	3.01	3.02	3.01333	0.0057735	270	270	269	269.667	0.57735	135	135	136	135.333	0.57735	0.94	0.94	0.93	0.936667	0.0057735	3.4	3.4	3.3	3.36667	0.057735	66	66	66	66	0
	30	6.94	6.93	6.95	6.94	0.01	2.66	2.67	2.66	2.66333	0.0057735	329	330	330	329.667	0.57735	163	163	164	163.333	0.57735	2.28	2.29	2.3	2.29	0.01	3.3	3.3	3.2	3.26667	0.057735	191	190	190	190.333	0.57735
M1	60	6.67	6.67	6.68	6.67333	0.0057735	2.86	2.86	2.87	2.86333	0.0057735	307	307	306	306.667	0.57735	153	154	154	153.667	0.57735	3.71	3.72	3.73	3.72	0.01	3.3	3.3	3.3	3.3	5.43896e-16	186	186	185	185.667	0.57735
	90	6.59	6.58	6.58	6.58333	0.0057735	3.11	3.11	3.12	3.11333	0.0057735	313	313	312	312.667	0.57735	156	157	157	156.667	0.57735	2.73	2.72	2.71	2.72	0.01	3.3	3.3	3.3	3.3	5.43896e-16	198	198	198	198	0
	30	6.91	6.92	6.92	6.91667	0.0057735	2.71	2.71	2.7	2.70667	0.0057735	315	316	316	315.667	0.57735	159	159	158	158.667	0.57735	0.24	0.25	0.25	0.246667	0.0057735	3.3	3.3	3.3	3.3	5.43896e-16	180	181	181	180.667	0.57735
M2	60	6.7	6.71	6.72	6.71	0.01	2.97	2.97	2.98	2.97333	0.0057735	314	314	313	313.667	0.57735	157	157	158	157.333	0.57735	2.86	2.84	2.85	2.85	0.01	3.3	3.3	3.3	3.3	5.43896e-16	181	180	180	180.333	0.57735
	90	6.72	6.71	6.71	6.71333	0.0057735	3.14	3.15	3.15	3.14667	0.0057735	317	318	318	317.667	0.57735	159	159	159	159	0	1.79	1.78	1.79	1.78667	0.0057735	3.4	3.4	3.3	3.36667	0.057735	191	190	190	190.333	0.57735
	30	6.91	6.92	6.92	6.91667	0.0057735	2.72	2.73	2.73	2.72667	0.0057735	325	325	324	324.667	0.57735	162	162	161	161.667	0.57735	0.92	0.94	0.93	0.93	0.01	3.2	3.3	3.2	3.23333	0.057735	180	180	179	179.667	0.57735
M3	60	6.77	6.76	6.77	6.76667	0.0057735	3.03	3.02	3.02	3.02333	0.0057735	322	322	321	321.667	0.57735	160	161	161	160.667	0.57735	2.79	2.77	2.76	2.77333	0.0152753	3.3	3.3	3.3	3.3	5.43896e-16	198	198	197	197.667	0.57735
	90	6.76	6.76	6.77	6.76333	0.0057735	3.23	3.24	3.24	3.23667	0.0057735	320	319	319	319.333	0.57735	159	159	159	159	0	2.1	2.11	2.1	2.10333	0.0057735	3.4	3.4	3.3	3.36667	0.057735	201	201	200	200.667	0.57735
